# Supplementary material
Source: PubMed Central journal article supplement (PMC3563968)

**Table S1.** Genbank numbers for DFR sequences used in PAML analyses. \* denotes sequences collected for this study.

| Species                      | Genbank Number      | Flower color                           |
|------------------------------|---------------------|----------------------------------------|
| <i>Dunalia brachyacantha</i> | JN593319*           | Blue                                   |
| <i>D. solanacea</i>          | JN593320*           | Yellow                                 |
| <i>Iochroma baumii</i>       | JN593317*           | Blue                                   |
| <i>I. calycinum</i>          | JN593314*           | Blue                                   |
| <i>I. cyaneum</i>            | GU595064            | Blue                                   |
| <i>I. fuchsioides</i>        | Allele A: JN593316* | Red                                    |
|                              | Allele B: JN593315* |                                        |
| <i>I. gesnerioides</i>       | GU595063            | Red                                    |
| <i>I. loxense</i>            | Allele A: JN593312* | White                                  |
|                              | Allele B: JN593313* |                                        |
| <i>I. parvifolium</i>        | JN593318*           | Blue                                   |
| <i>I. umbellatum</i>         | Allele A: JN593321* | Polymorphic (blue,<br>white, or green) |
|                              | Allele B: JN593322* |                                        |
| <i>Capsicum annuum</i>       | FJ705846            | White                                  |
| <i>Solanum tuberosum</i>     | AF449422            | Polymorphic (blue or<br>white)         |
| <i>S. lycopersicum</i>       | Z18277              | Yellow                                 |
| <i>Nicotiana tabaccum</i>    | EF421430            | Pink                                   |
| <i>Petunia hybrida</i>       | EU189078            | Purple                                 |
| <i>Nierembergia caerulea</i> | AB078510            | Blue                                   |
| <i>Evolvulus glomeratus</i>  | EU189082            | Blue                                   |
| <i>Gentiana triflora</i>     | D85185              | Blue                                   |

**Table S2.** Data from DFR assays. The name for each sequence gives a basal sequence plus the additional mutations present. The nodes corresponding to the Blue Ancestor and Red Ancestor are shown in fig. 2. The amino acid present at each of the five mutation sites (M1 – M5) is indicated by standard amino acid code. The header gives the amino acid position for each of these amino acids (e.g. mutation M1 is at position 218). Rep = replicate. The amount of product produced in  $\mu$ moles is indicated for each of the substrates.

| Sequence                                         | Amino Acid |     |     |     |     | Rep | $\mu$ moles product produced |          |          |
|--------------------------------------------------|------------|-----|-----|-----|-----|-----|------------------------------|----------|----------|
|                                                  | M1:        | M2: | M3: | M4: | M5: |     | DHK                          | DHQ      | DHM      |
|                                                  | 218        | 237 | 267 | 146 | 350 |     |                              |          |          |
| Blue Ancestor                                    | L          | Q   | H   | V   | A   | 1   | 0.002640                     | 0.003718 | 0.003638 |
|                                                  |            |     |     |     |     | 2   | 0.002586                     | 0.003655 | 0.003821 |
|                                                  |            |     |     |     |     | 3   | 0.002559                     | 0.003655 | 0.003979 |
| Blue Ancestor + M1                               | F          | Q   | H   | V   | A   | 1   | 0.022324                     | 0.008008 | 0.001544 |
|                                                  |            |     |     |     |     | 2   | 0.016097                     | 0.005785 | 0.001675 |
|                                                  |            |     |     |     |     | 3   | 0.016909                     | 0.006348 | 0.001413 |
| Blue Ancestor + M2                               | L          | K   | H   | V   | A   | 1   | 0.017423                     | 0.006474 | 0.004345 |
|                                                  |            |     |     |     |     | 2   | 0.018696                     | 0.006223 | 0.004790 |
|                                                  |            |     |     |     |     | 3   | 0.019319                     | 0.006505 | 0.004005 |
| Blue Ancestor + M3                               | L          | Q   | Y   | V   | A   | 1   | 0.006810                     | 0.007257 | 0.003272 |
|                                                  |            |     |     |     |     | 2   | 0.005185                     | 0.006317 | 0.003141 |
|                                                  |            |     |     |     |     | 3   | 0.006349                     | 0.006881 | 0.004581 |
| Blue Ancestor + M1 + M2                          | F          | K   | H   | V   | A   | 1   | 0.016070                     | 0.005190 | 0.004371 |
|                                                  |            |     |     |     |     | 2   | 0.015312                     | 0.005096 | 0.003062 |
|                                                  |            |     |     |     |     | 3   | 0.014174                     | 0.006286 | 0.004581 |
| Blue Ancestor + M1 + M3                          | F          | Q   | Y   | V   | A   | 1   | 0.004454                     | 0.004093 | 0.001073 |
|                                                  |            |     |     |     |     | 2   | 0.005077                     | 0.003843 | 0.001099 |
|                                                  |            |     |     |     |     | 3   | 0.005185                     | 0.004062 | 0.000968 |
| Blue Ancestor + M2 + M3                          | L          | K   | Y   | V   | A   | 1   | 0.014228                     | 0.005472 | 0.005130 |
|                                                  |            |     |     |     |     | 2   | 0.017234                     | 0.005847 | 0.006648 |
|                                                  |            |     |     |     |     | 3   | 0.015149                     | 0.008228 | 0.004005 |
| Blue Ancestor + M1 + M2 + M3<br>(= Red Ancestor) | F          | K   | Y   | V   | A   | 1   | 0.003317                     | 0.001337 | 0.000995 |
|                                                  |            |     |     |     |     | 2   | 0.003290                     | 0.001431 | 0.001099 |
|                                                  |            |     |     |     |     | 3   | 0.003290                     | 0.001306 | 0.000811 |
| Red Ancestor + M4                                | F          | K   | Y   | I   | A   | 1   | 0.004400                     | 0.001243 | 0.000864 |
|                                                  |            |     |     |     |     | 2   | 0.004725                     | 0.001400 | 0.000995 |
|                                                  |            |     |     |     |     | 3   | 0.004535                     | 0.001369 | 0.000995 |
| Red Ancestor + M5                                | F          | K   | Y   | V   | E   | 1   | 0.005727                     | 0.002026 | 0.001021 |
|                                                  |            |     |     |     |     | 2   | 0.004833                     | 0.001901 | 0.000759 |
|                                                  |            |     |     |     |     | 3   | 0.004779                     | 0.001776 | 0.000916 |
| Red Ancestor + M4 + M5                           | F          | K   | Y   | I   | E   | 1   | 0.003669                     | 0.001118 | 0.000681 |

|                                                                    |   |   |   |   |   |   |          |          |          |
|--------------------------------------------------------------------|---|---|---|---|---|---|----------|----------|----------|
| (= <i>I. gesnerioides</i> )                                        |   |   |   |   |   | 2 | 0.003154 | 0.000962 | 0.000602 |
|                                                                    |   |   |   |   |   | 3 | 0.003371 | 0.001275 | 0.000654 |
| <i>I. baumii</i>                                                   | L | Q | H | V | A | 1 | 0.003588 | 0.004125 | 0.004816 |
| (=Blue Ancestor + 105:N → Y)                                       |   |   |   |   |   | 2 | 0.002640 | 0.004250 | 0.004371 |
|                                                                    |   |   |   |   |   | 3 | 0.003479 | 0.004062 | 0.004266 |
| <i>I. cyaneum</i>                                                  | L | Q | H | V | A | 1 | 0.002071 | 0.003498 | 0.004005 |
| (=Blue Ancestor + 7 substitutions<br>at sites other than M1 to M5) |   |   |   |   |   | 2 | 0.002098 | 0.004031 | 0.004868 |
|                                                                    |   |   |   |   |   | 3 | 0.002153 | 0.003843 | 0.004633 |

**Table S3.** Relative activity (RA) of DFR from present-day taxa, inferred ancestors, and possible intermediates. RA was calculated by dividing the activity for a single substrate by the sum of activities across all the substrates. Values reflect averages across three replicates (see table S2).

| Sequence                                           | Relative Activity on: |      |      |
|----------------------------------------------------|-----------------------|------|------|
|                                                    | DHK                   | DHQ  | DHM  |
| Blue Ancestor                                      | 0.26                  | 0.36 | 0.38 |
| Blue Ancestor + M1                                 | 0.69                  | 0.25 | 0.06 |
| Blue Ancestor + M2                                 | 0.63                  | 0.22 | 0.15 |
| Blue Ancestor + M3                                 | 0.37                  | 0.41 | 0.22 |
| Blue Ancestor + M1 + M2                            | 0.62                  | 0.22 | 0.16 |
| Blue Ancestor + M1 + M3                            | 0.44                  | 0.37 | 0.20 |
| Blue Ancestor + M2 + M3                            | 0.57                  | 0.24 | 0.19 |
| Blue Ancestor + M1 + M2 + M3 (= Red Ancestor)      | 0.59                  | 0.24 | 0.17 |
| Red Ancestor + M4                                  | 0.67                  | 0.20 | 0.14 |
| Red Ancestor + M5                                  | 0.65                  | 0.24 | 0.11 |
| Red Ancestor + M4 + M5 (= <i>I. gesnerioides</i> ) | 0.66                  | 0.22 | 0.13 |
| <i>I. baumii</i> (= Blue Ancestor + 105:N→Y)       | 0.27                  | 0.35 | 0.38 |
| <i>I. cyaneum</i>                                  | 0.20                  | 0.36 | 0.43 |

**Table S4.** Comparisons of relative activities of DFR on different substrates for alleles that differ by one mutation. A. Possible substitutions involving M1 through M3 between Blue Ancestor (BA) and Red Ancestor (RA= BA+M1+M2+M3). B. Possible substitutions involving M4 and M5 between Red Ancestor and *I. gesnerioides*. Symbols F, P and B as in Table 3.

| Comparison |     |             | Multivariate Analysis |        |        |    | Univariate Analysis |        |    |       |        |    |        |        |    |
|------------|-----|-------------|-----------------------|--------|--------|----|---------------------|--------|----|-------|--------|----|--------|--------|----|
|            |     |             | Wilks $\lambda$       | F      | P      | B  | F                   | DHK    |    |       | DHQ    |    |        | DHM    |    |
|            |     |             |                       |        |        |    | F                   | P      | B  | F     | P      | B  | F      | P      | B  |
| A.         |     |             |                       |        |        |    |                     |        |    |       |        |    |        |        |    |
| BA         | vs. | BA+M1       | 0.0222                | 205.35 | <.0001 | ** | 205.35              | <.0001 | ** | 29.59 | <.0001 | ** | 259.82 | <.0001 | ** |
| BA         | vs. | BA+M2       | 0.0199                | 230.33 | <.0001 | ** | 230.33              | <.0001 | ** | 50.88 | <.0001 | ** | 104.61 | <.0001 | ** |
| BA         | vs. | BA+M3       | 0.0657                | 66.32  | <.0001 | ** | 66.32               | <.0001 | ** | 4.63  | 0.047  |    | 45.38  | <.0001 | ** |
| BA+M1      | vs. | BA+M1+M2    | 0.1222                | 33.52  | <.0001 | ** | 33.52               | 0.0008 | *  | 2.14  | 0.1632 |    | 42.00  | <.0001 | ** |
| BA+M1      | vs. | BA+M1+M3    | 0.1167                | 35.33  | <.0001 | ** | 35.33               | <.0001 | ** | 51.10 | <.0001 | ** | 10.98  | 0.0044 | *  |
| BA+M2      | vs. | BA+M2+M1    | 0.9521                | 0.23   | 0.8707 |    | 0.23                | 0.3996 |    | 0.05  | 0.8196 |    | 0.35   | 0.5639 |    |
| BA+M2      | vs. | BA+M2+M3    | 0.5516                | 3.79   | 0.035  |    | 3.79                | 0.0038 | *  | 1.00  | 0.3329 |    | 4.33   | 0.0492 |    |
| BA+M3      | vs. | BA+M3+M1    | 0.2241                | 16.16  | <.0001 | ** | 16.16               | <.0001 | ** | 0.20  | 0.6636 |    | 36.84  | <.0001 | ** |
| BA+M3      | vs. | BA+M3+M2    | 0.0910                | 46.6   | <.0001 | ** | 46.6                | <.0001 | ** | 68.66 | <.0001 | ** | 1.86   | 0.1918 |    |
| BA+M1+M2   | vs. | BA+M1+M2+M3 | 0.8670                | 0.72   | 0.5588 |    | 0.72                | 0.1455 |    | 0.90  | 0.3569 |    | 0.31   | 0.5869 |    |
| BA+M1+M3   | vs. | BA+M1+M2+M3 | 0.1160                | 35.56  | <.0001 | ** | 35.56               | 0.0001 | ** | 58.69 | <.0001 | ** | 13.85  | 0.0019 | *  |
| BA+M2+M3   | vs. | BA+M1+M2+M3 | 0.8462                | 0.85   | 0.4902 |    | 0.85                | 0.3413 |    | 0.03  | 0.8579 |    | 0.97   | 0.3395 |    |
| B.         |     |             |                       |        |        |    |                     |        |    |       |        |    |        |        |    |
| RA         | vs. | RA+M4       | 0.1732                | 16.71  | 0.0022 | ** | 37.89               | 0.0003 | ** | 20.67 | 0.0019 | *  | 11.69  | 0.0091 |    |
| RA         | vs. | RA+M5       | 0.1738                | 16.64  | 0.0022 | ** | 21.14               | 0.0018 | *  | 0.00  | 0.9551 |    | 36.97  | 0.0003 | ** |
| RA+M4      | vs. | RA+M4+M5    | 0.5906                | 2.43   | 0.1583 |    | 0.32                | 0.5885 |    | 4.28  | 0.0722 |    | 2.06   | 0.1893 |    |
| RA+M5      | vs. | RA+M4+M5    | 0.5486                | 2.88   | 0.1223 |    | 0.99                | 0.3494 |    | 5.85  | 0.042  |    | 1.51   | 0.2545 |    |

**Fig. S1.** Maximum likelihood reconstruction of *Dfr* sequence evolution in the red-flowered clade. The species tree and the *Dfr* gene tree differ in the placement of *I. fuchsioides* allele A. However, both topologies place three mutations (M1, M2, M3) along the branch leading from the Blue Ancestor (BA) to the ancestor of the red-flowered species (Red Ancestor, RA). Two subsequent mutations (M4 and M5) occurred along the lineage leading to *I. gesnerioides* in both trees. Amino acids are denoted with standard single letter abbreviations and values in parentheses are the posterior probabilities of the state at the beginning and end of the branch, respectively.

### Species tree

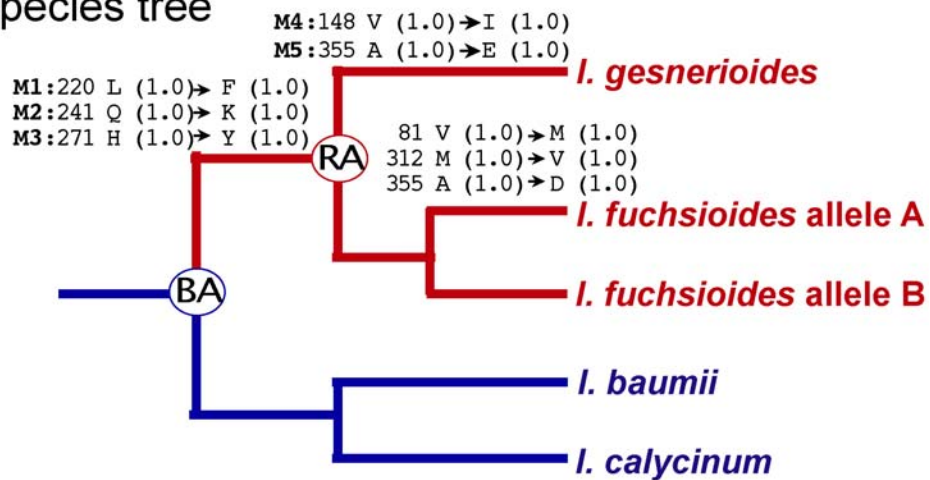

### *Dfr* gene tree

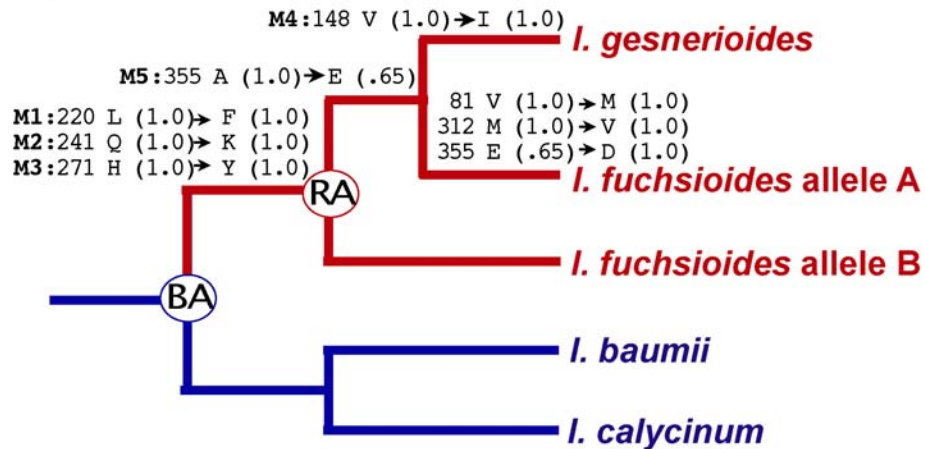

**Fig.S2. Location of mutations associated with the transition to red flowers on the DFR enzyme.** The crystal structure was created for *Vitis* (Petit et al 2007) with the NADPH co-factor (light gray) and DHQ (yellow) as the substrate. Amino acids involved in the color transition are shown in red. Numbers 1-3 correspond to M1, M2, M3, the amino acids that changed during the transition from blue to red flowers (fig. 2). Numbers 4 and 5 indicate M4 and M5, the substitutions subsequent the transition.

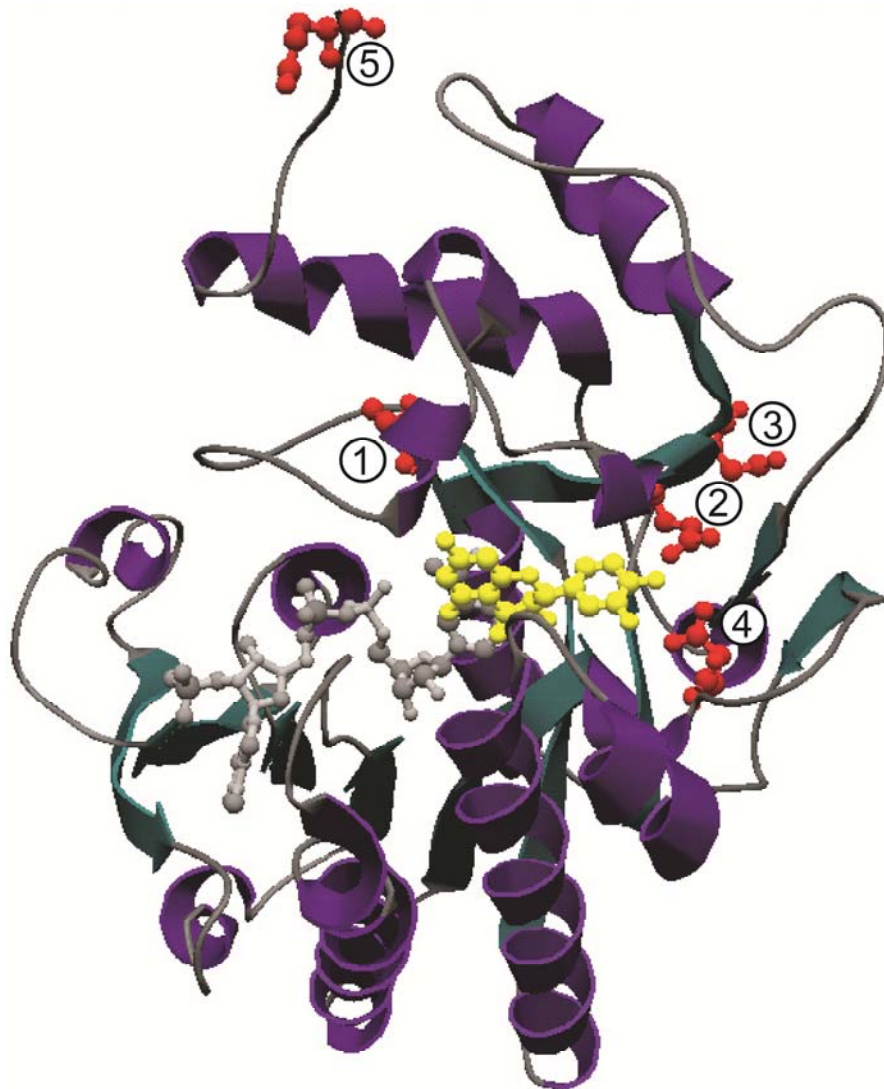

Supplement: supp_mss255_mss255_SupplRevised2.pdf [file supp_mss255_mss255_SupplRevised2.pdf]
